# Supplementary material
Source: HighWire-hosted journal article supplement (https://gut.bmj.com/content/69/9/1572)
Supplement: inline-supplementary-material-6 [file inline-supplementary-material-6.xls]

## Sheet: S. Table 5
S. Table 5: SparCC co-occurence among bacteria genera before OAC treatment
Bacteria genus 1	Bacteria genus 2	Correlation coefficient	P values	FDR adjust P values
f_Lachnospiraceae	Acinetobacter	0.295563	2.76308e-07	4.19326e-05
Haemophilus	Actinobacillus	0.407874	2.76308e-07	4.19326e-05
Neisseria	Actinobacillus	0.334972	0.00032	0.0314323
Streptococcus	Actinobacillus	0.364026	2.76308e-07	4.19326e-05
Prevotella	Actinomyces	0.382811	2.76308e-07	4.19326e-05
Cryocola	Archromobacter	0.357003	0.00032	0.0314323
f_Enterobacteriacea	Archromobacter	0.254319	0.00032	0.0314323
Helicobacter	Archromobacter	-0.511899	2.76308e-07	4.19326e-05
Methylobacterium	Archromobacter	0.277653	2.76308e-07	4.19326e-05
Microbacterium	Archromobacter	0.378256	2.76308e-07	4.19326e-05
Pseudomonas	Archromobacter	0.477273	2.76308e-07	4.19326e-05
Serratia	Archromobacter	0.332006	2.76308e-07	4.19326e-05
Stenotrophomonas	Archromobacter	0.29847	0.00032	0.0314323
Vibrio	Archromobacter	0.277976	0.00032	0.0314323
Bifidobacterium	Bacillus	0.345908	2.76308e-07	4.19326e-05
f_Lachnospiraceae	Bacillus	0.289498	2.76308e-07	4.19326e-05
Lactobacillus	Bacillus	0.35502	2.76308e-07	4.19326e-05
Acinetobacter	Bifidobacterium	0.279172	0.00064	0.0492362
Actinomyces	Bifidobacterium	-0.234549	0.00064	0.0492362
Clostridium	Bifidobacterium	0.352428	2.76308e-07	4.19326e-05
Coprococcus	Bifidobacterium	0.387208	2.76308e-07	4.19326e-05
Cryocola	Bifidobacterium	0.355689	0.00032	0.0314323
f_Enterobacteriacea	Bifidobacterium	0.718213	2.76308e-07	4.19326e-05
f_Lachnospiraceae	Bifidobacterium	0.546058	2.76308e-07	4.19326e-05
Bifidobacterium	Blautia	0.523445	2.76308e-07	4.19326e-05
Coprococcus	Blautia	0.51032	2.76308e-07	4.19326e-05
f_Enterobacteriacea	Blautia	0.381237	2.76308e-07	4.19326e-05
Faecalibacterium	Blautia	0.281954	0.00032	0.0314323
f_Lachnospiraceae	Blautia	0.56899	2.76308e-07	4.19326e-05
Lactobacillus	Blautia	0.322558	2.76308e-07	4.19326e-05
Acinetobacter	Clostridium	0.242943	0.00032	0.0314323
Coprococcus	Clostridium	0.261407	0.00064	0.0492362
f_Enterobacteriacea	Clostridium	0.295673	2.76308e-07	4.19326e-05
Helicobacter	Clostridium	-0.283384	0.00064	0.0492362
f_Lachnospiraceae	Clostridium	0.252431	0.00064	0.0492362
Faecalibacterium	Coprococcus	0.376677	2.76308e-07	4.19326e-05
f_Lachnospiraceae	Coprococcus	0.603826	2.76308e-07	4.19326e-05
Helicobacter	Corynebacterium	-0.312679	2.76308e-07	4.19326e-05
f_Enterobacteriacea	Cryocola	0.380364	2.76308e-07	4.19326e-05
Helicobacter	Cryocola	-0.595502	2.76308e-07	4.19326e-05
Pseudomonas	Cryocola	0.792312	2.76308e-07	4.19326e-05
Acinetobacter	Enhydrobacter	0.325178	2.76308e-07	4.19326e-05
Neisseria	Enhydrobacter	0.236033	0.00064	0.0492362
Bifidobacterium	f_Enterobacteriacea	0.303383	0.00032	0.0314323
f_Enterobacteriacea	f_Enterobacteriacea	0.351442	0.00032	0.0314323
Helicobacter	f_Enterobacteriacea	-0.381442	2.76308e-07	4.19326e-05
f_Lachnospiraceae	f_Enterobacteriacea	0.428801	2.76308e-07	4.19326e-05
f_Lachnospiraceae	f_Enterobacteriacea	0.32146	2.76308e-07	4.19326e-05
Pseudomonas	f_Enterobacteriacea	0.314095	0.00064	0.0492362
Bifidobacterium	Escherichia	0.634505	2.76308e-07	4.19326e-05
Blautia	Escherichia	0.485243	2.76308e-07	4.19326e-05
Coprococcus	Escherichia	0.419181	2.76308e-07	4.19326e-05
f_Enterobacteriacea	Escherichia	0.526504	2.76308e-07	4.19326e-05
f_Enterobacteriacea	Escherichia	0.320348	0.00032	0.0314323
Faecalibacterium	Escherichia	0.309199	2.76308e-07	4.19326e-05
f_Lachnospiraceae	Escherichia	0.579392	2.76308e-07	4.19326e-05
Lactobacillus	Escherichia	0.276348	2.76308e-07	4.19326e-05
Oscillospira	Escherichia	0.261373	0.00064	0.0492362
Ruminicoccus	Escherichia	0.56528	2.76308e-07	4.19326e-05
f_Lachnospiraceae	Faecalibacterium	0.365084	2.76308e-07	4.19326e-05
S24-7_unclassified	Faecalibacterium	0.264017	2.76308e-07	4.19326e-05
Neisseria	Fusobacterium	0.346196	2.76308e-07	4.19326e-05
Prevotella	Fusobacterium	0.301489	0.00032	0.0314323
S24-7_unclassified	Fusobacterium	0.245036	2.76308e-07	4.19326e-05
Haemophilus	Gemella	0.558137	2.76308e-07	4.19326e-05
Leptotrichia	Gemella	0.289852	2.76308e-07	4.19326e-05
Neisseria	Gemella	0.491583	2.76308e-07	4.19326e-05
Porphyromonas	Gemella	0.258401	0.00064	0.0492362
Prevotella	Gemella	0.308655	2.76308e-07	4.19326e-05
Rothia	Gemella	0.378755	2.76308e-07	4.19326e-05
Streptococcus	Gemella	0.562706	2.76308e-07	4.19326e-05
Cryocola	Geobacillus	0.270532	2.76308e-07	4.19326e-05
Actinomyces	Granulicatella	0.427696	2.76308e-07	4.19326e-05
Gemella	Granulicatella	0.390887	2.76308e-07	4.19326e-05
Haemophilus	Granulicatella	0.463027	2.76308e-07	4.19326e-05
Leptotrichia	Granulicatella	0.284513	0.00064	0.0492362
Neisseria	Granulicatella	0.475318	2.76308e-07	4.19326e-05
Porphyromonas	Granulicatella	0.290638	2.76308e-07	4.19326e-05
Prevotella	Granulicatella	0.427629	2.76308e-07	4.19326e-05
Rothia	Granulicatella	0.454979	2.76308e-07	4.19326e-05
Streptococcus	Granulicatella	0.585431	2.76308e-07	4.19326e-05
Neisseria	Haemophilus	0.614691	2.76308e-07	4.19326e-05
Prevotella	Haemophilus	0.377552	2.76308e-07	4.19326e-05
Streptococcus	Haemophilus	0.646056	2.76308e-07	4.19326e-05
f_Enterobacteriacea	Halomonas	0.360121	2.76308e-07	4.19326e-05
Helicobacter	Halomonas	-0.287906	0.00064	0.0492362
Pseudomonas	Halomonas	0.310559	0.00032	0.0314323
Stenotrophomonas	Halomonas	0.394007	2.76308e-07	4.19326e-05
Acinetobacter	Lactobacillus	0.327357	2.76308e-07	4.19326e-05
Bifidobacterium	Lactobacillus	0.314404	0.00064	0.0492362
f_Lachnospiraceae	Lactobacillus	0.302789	0.00032	0.0314323
Neisseria	Leptotrichia	0.325526	2.76308e-07	4.19326e-05
Prevotella	Leptotrichia	0.372315	2.76308e-07	4.19326e-05
Streptococcus	Leptotrichia	0.33424	2.76308e-07	4.19326e-05
Cryocola	Methylobacterium	0.502233	2.76308e-07	4.19326e-05
f_Enterobacteriacea	Methylobacterium	0.267685	0.00064	0.0492362
Helicobacter	Methylobacterium	-0.458375	2.76308e-07	4.19326e-05
Microbacterium	Methylobacterium	0.337649	2.76308e-07	4.19326e-05
Pseudomonas	Methylobacterium	0.440064	2.76308e-07	4.19326e-05
Serratia	Methylobacterium	0.302601	2.76308e-07	4.19326e-05
Cryocola	Microbacterium	0.43899	2.76308e-07	4.19326e-05
Helicobacter	Microbacterium	-0.476879	2.76308e-07	4.19326e-05
Pseudomonas	Microbacterium	0.438632	2.76308e-07	4.19326e-05
Fusobacterium	Moraxella	0.238681	0.00064	0.0492362
Haemophilus	Moraxella	0.296753	2.76308e-07	4.19326e-05
Halomonas	Mycobacterium	0.378679	2.76308e-07	4.19326e-05
Pseudomonas	Mycobacterium	0.252349	0.00064	0.0492362
Stenotrophomonas	Mycobacterium	0.294025	2.76308e-07	4.19326e-05
Vibrio	Mycobacterium	0.266997	0.00032	0.0314323
Actinomyces	Neisseria	0.230365	0.00032	0.0314323
Prevotella	Neisseria	0.292644	0.00032	0.0314323
Streptococcus	Neisseria	0.626141	2.76308e-07	4.19326e-05
f_Lachnospiraceae	Oscillospira	0.287243	0.00032	0.0314323
Neisseria	Parvimonas	0.259847	0.00032	0.0314323
Fusobacterium	Porphyromonas	0.414389	2.76308e-07	4.19326e-05
Haemophilus	Porphyromonas	0.293353	2.76308e-07	4.19326e-05
Neisseria	Porphyromonas	0.329215	0.00032	0.0314323
Prevotella	Porphyromonas	0.299145	2.76308e-07	4.19326e-05
Prevotella	Porphyromonas	0.285489	0.00032	0.0314323
Streptococcus	Porphyromonas	0.320844	2.76308e-07	4.19326e-05
Prevotella	Prevotella	0.300252	2.76308e-07	4.19326e-05
Streptococcus	Prevotella	0.307858	2.76308e-07	4.19326e-05
Halomonas	Propionibacterium	0.254625	2.76308e-07	4.19326e-05
Helicobacter	Propionibacterium	-0.295286	0.00032	0.0314323
Mycobacterium	Propionibacterium	0.282654	0.00032	0.0314323
Pseudomonas	Propionibacterium	0.308877	2.76308e-07	4.19326e-05
Serratia	Propionibacterium	0.278268	2.76308e-07	4.19326e-05
Helicobacter	Pseudomonas	-0.648	2.76308e-07	4.19326e-05
Fusobacterium	Rothia	0.271911	0.00064	0.0492362
Haemophilus	Rothia	0.490545	2.76308e-07	4.19326e-05
Leptotrichia	Rothia	0.307608	2.76308e-07	4.19326e-05
Moraxella	Rothia	0.278876	0.00032	0.0314323
Neisseria	Rothia	0.477729	2.76308e-07	4.19326e-05
Streptococcus	Rothia	0.511789	2.76308e-07	4.19326e-05
Bacillus	Ruminicoccus	0.289429	0.00064	0.0492362
Bifidobacterium	Ruminicoccus	0.39022	2.76308e-07	4.19326e-05
Blautia	Ruminicoccus	0.514784	2.76308e-07	4.19326e-05
Clostridium	Ruminicoccus	0.286864	2.76308e-07	4.19326e-05
Coprococcus	Ruminicoccus	0.610059	2.76308e-07	4.19326e-05
Faecalibacterium	Ruminicoccus	0.352466	2.76308e-07	4.19326e-05
f_Lachnospiraceae	Ruminicoccus	0.597177	2.76308e-07	4.19326e-05
Lactobacillus	Ruminicoccus	0.265223	0.00064	0.0492362
Oscillospira	Ruminicoccus	0.262442	0.00032	0.0314323
Cryocola	Serratia	0.338329	2.76308e-07	4.19326e-05
f_Enterobacteriacea	Serratia	0.302268	2.76308e-07	4.19326e-05
Helicobacter	Serratia	-0.469765	2.76308e-07	4.19326e-05
Pseudomonas	Serratia	0.400537	2.76308e-07	4.19326e-05
Sphingomonas	Serratia	0.253655	0.00032	0.0314323
Bifidobacterium	SMB53	0.297743	2.76308e-07	4.19326e-05
Blautia	SMB53	0.440792	2.76308e-07	4.19326e-05
Clostridium	SMB53	0.285235	0.00032	0.0314323
Coprococcus	SMB53	0.520029	2.76308e-07	4.19326e-05
Escherichia	SMB53	0.398023	2.76308e-07	4.19326e-05
Faecalibacterium	SMB53	0.316709	2.76308e-07	4.19326e-05
Helicobacter	SMB53	-0.336025	2.76308e-07	4.19326e-05
f_Lachnospiraceae	SMB53	0.547264	2.76308e-07	4.19326e-05
Ruminicoccus	SMB53	0.541524	2.76308e-07	4.19326e-05
Cryocola	Sphingomonas	0.313691	2.76308e-07	4.19326e-05
Helicobacter	Sphingomonas	-0.381548	2.76308e-07	4.19326e-05
Pseudomonas	Sphingomonas	0.29539	0.00032	0.0314323
Corynebacterium	Stenotrophomonas	0.345439	2.76308e-07	4.19326e-05
f_Enterobacteriacea	Stenotrophomonas	0.261074	0.00032	0.0314323
Helicobacter	Stenotrophomonas	-0.413809	2.76308e-07	4.19326e-05
Pseudomonas	Stenotrophomonas	0.309655	0.00032	0.0314323
Serratia	Stenotrophomonas	0.266447	0.00064	0.0492362
Actinomyces	Streptococcus	0.336737	2.76308e-07	4.19326e-05
Helicobacter	Streptococcus	-0.347122	2.76308e-07	4.19326e-05
Prevotella	Streptococcus	0.466251	2.76308e-07	4.19326e-05
Bifidobacterium	Veillonella	0.282962	2.76308e-07	4.19326e-05
Prevotella	Veillonella	0.32342	2.76308e-07	4.19326e-05
Streptococcus	Veillonella	0.375087	2.76308e-07	4.19326e-05
Cryocola	Vibrio	0.332935	2.76308e-07	4.19326e-05
f_Enterobacteriacea	Vibrio	0.364509	2.76308e-07	4.19326e-05
Halomonas	Vibrio	0.440921	2.76308e-07	4.19326e-05
Helicobacter	Vibrio	-0.411701	2.76308e-07	4.19326e-05
Methylobacterium	Vibrio	0.296974	2.76308e-07	4.19326e-05
Pseudomonas	Vibrio	0.416568	2.76308e-07	4.19326e-05
Serratia	Vibrio	0.268442	0.00064	0.0492362
Stenotrophomonas	Vibrio	0.391568	2.76308e-07	4.19326e-05
