# Supplementary material
Source: HighWire-hosted journal article supplement (https://gut.bmj.com/content/69/9/1572)

## S figure 1

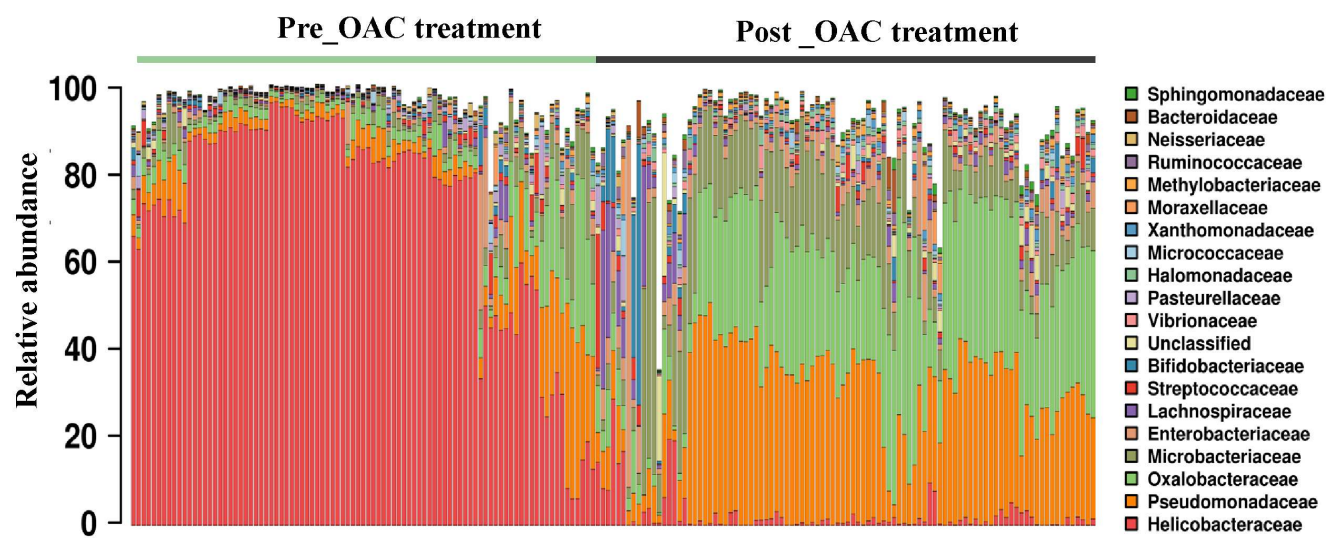

Bacterial composition at family level pre and one year post OAC treatment

Supplement: inline-supplementary-material-2 [file inline-supplementary-material-2.pdf]
